# Supplementary material
Source: Royal Society of Chemistry journal article supplement (doi:10.1039/d6ey00038j)
Supplement: d6ey00038j1.pdf [file d6ey00038j1.pdf]

## Mechanism study on hydrogen generation from metal hydride coupled methanol steam reforming

Kuerbangnisha Kadeer<sup>a</sup>, Yufei Jiang<sup>a</sup>, Xiao Liu<sup>b</sup>, Tingzhou Li<sup>a</sup>, Guofu Lu<sup>a</sup>, Chaoyuan Hu<sup>a</sup>, Yu Shi<sup>b</sup>, Xingguo Li<sup>a</sup>, Fangqin Guo<sup>c</sup>, Takayuki Ichikawa<sup>c</sup>, Lei Xie<sup>b,\*</sup>, Jie Zheng<sup>a,\*</sup>

- a. Beijing National Laboratory for Molecular Sciences (BNLMS), College of Chemistry and Molecular Engineering, Peking University, Beijing 100871, China.  
b. Sunan Institute for Molecular Engineering, Peking University, Building 6, Xianshi Road No.88, Changshu Hi-Tech Industrial Development Zone, Jiangsu, 215500, China  
c. Graduate School of Advanced Science and Engineering, Hiroshima University, Higashihiroshima 739-8527, Japan  
Corresponding author e-mail: [zhengjie@pku.edu.cn](mailto:zhengjie@pku.edu.cn), [xielei@pkusim.com](mailto:xielei@pkusim.com)

### 1. Supplementary Figures

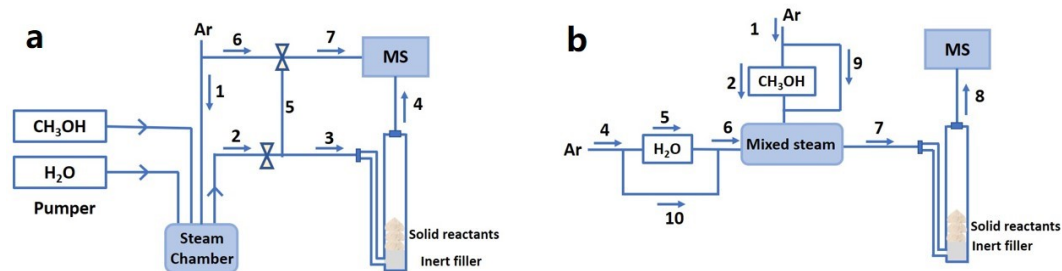

Fig.S

1 Schematics of (a) online MS setup and (b) MS system for isotope labeling experiments

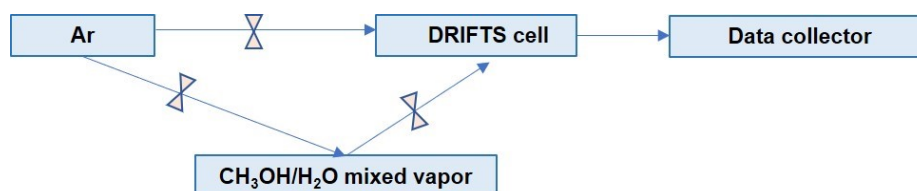

Fig.S2 Schematic of the in-situ IR experiment

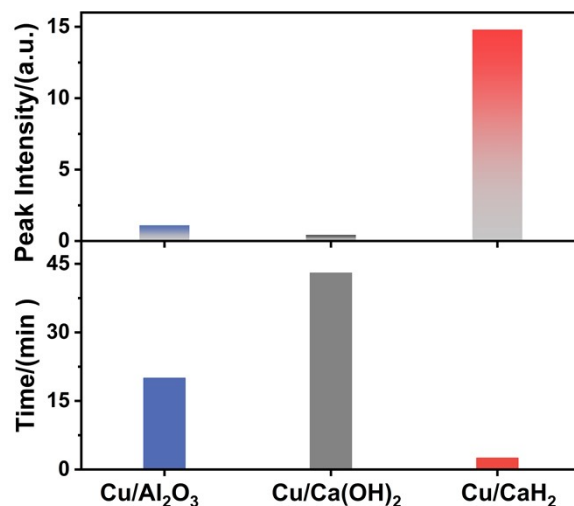

Fig.S3 MSR initiation time and H<sub>2</sub> signal peak intensity over Cu/Al<sub>2</sub>O<sub>3</sub>, Cu/Ca(OH)<sub>2</sub> and Cu/CaH<sub>2</sub>. (Initiation time is defined as the first appearance of the H<sub>2</sub> signal; for Cu/CaH<sub>2</sub>, it refers to the point where the signal starts to exceed that of pure hydrolysis. Peak intensity corresponds to the maximum H<sub>2</sub> signal at t = 25, 48 and 5 min, respectively.)

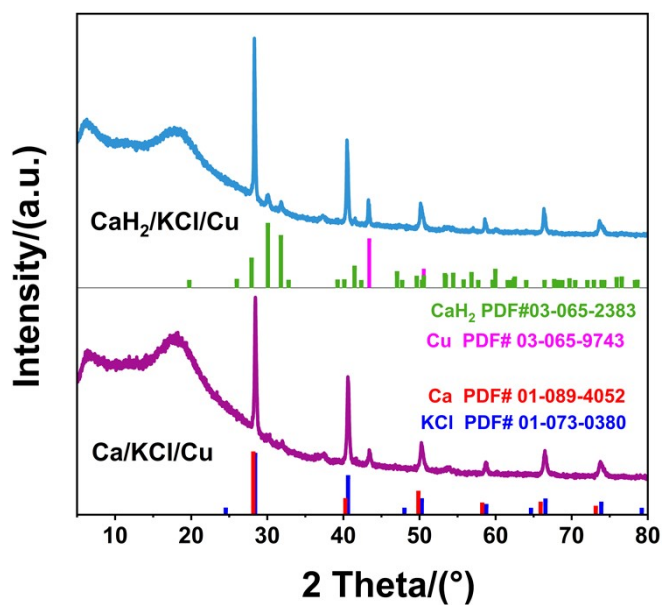

Fig. S4 XRD Patterns of Ca/KCl/Cu and CaH<sub>2</sub>/KCl/Cu

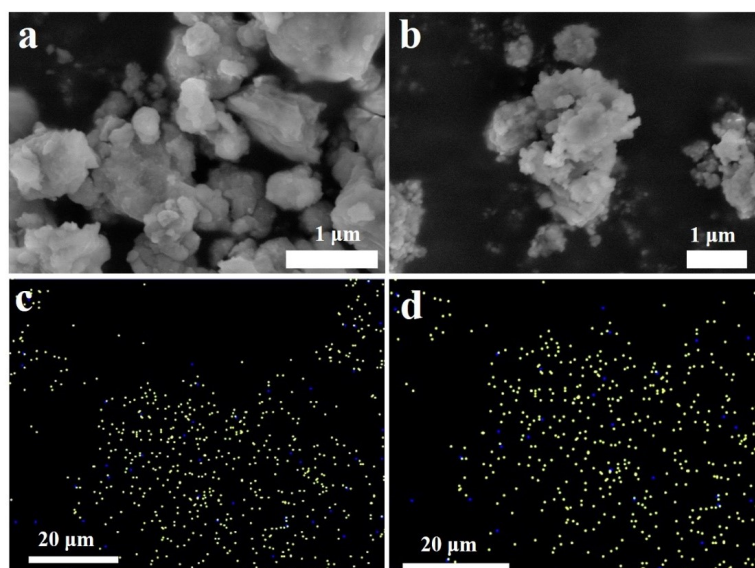

Fig.S5 (a, b) SEM images of Ca/KCl/Cu and CaH<sub>2</sub>/KCl/Cu and (c, d) corresponding elemental mapping of surface Ca (yellow) and Cu (blue)

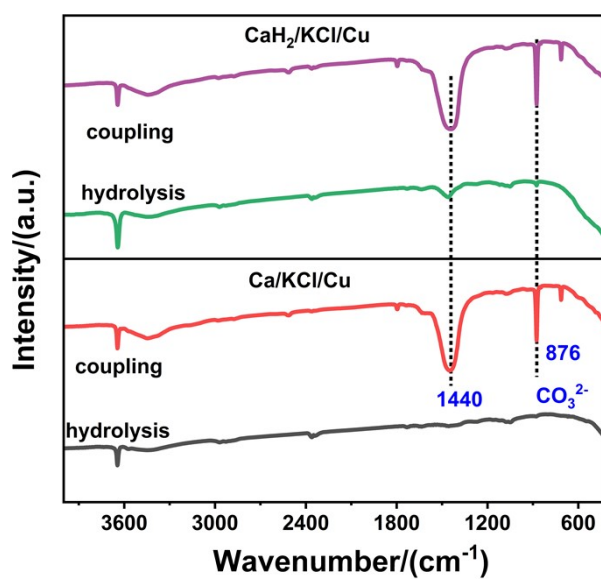

Fig. S6 Comparison of IR spectra of solid hydrogen production products from the coupling of Ca/KCl/Cu and CaH<sub>2</sub>/KCl/Cu with MSR

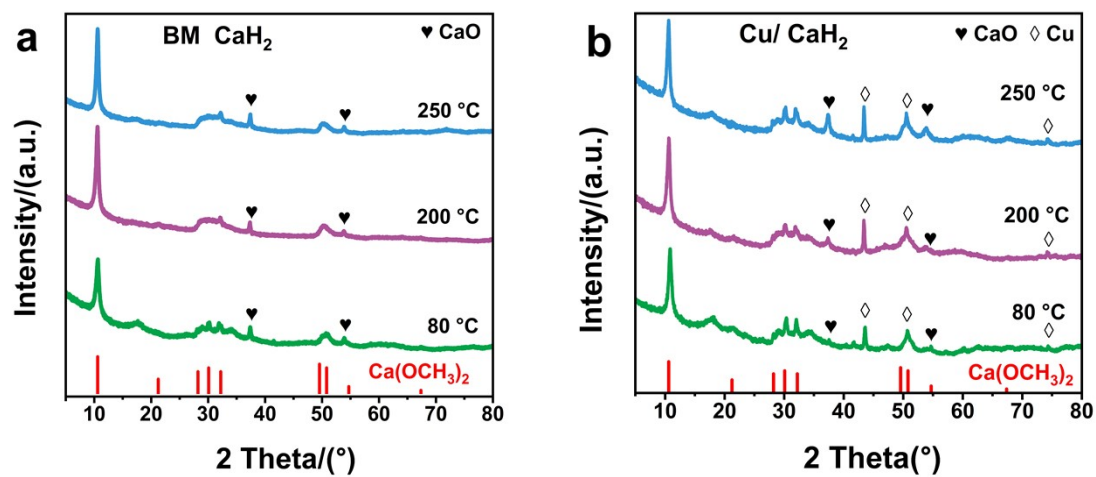

Fig. S7 Comparison of alcoholysis products of ball-milled  $\text{CaH}_2$  (a) before and (b) after Cu incorporation under different temperature conditions

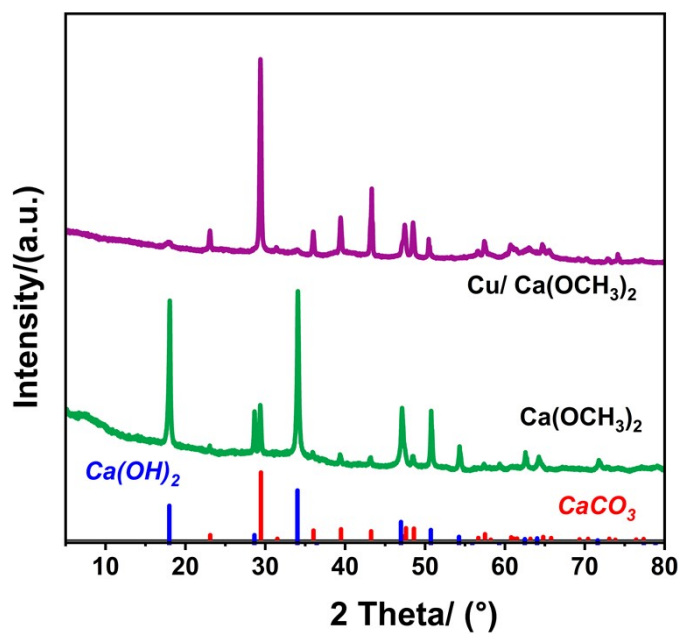

Fig.S8 XRD of solid products after reaction with water for samples of  $(\text{CH}_3\text{O})_2\text{Ca}$  before and after compositing with Cu, respectively

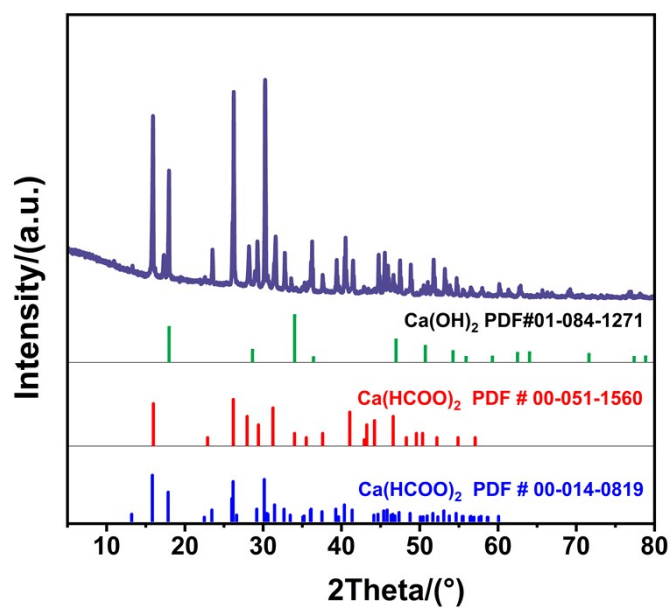

Fig.S9 XRD patterns of solid products obtained from the reactions of  $\text{CaH}_2/\text{CuO}$  with  $\text{HCOOH}$  solutions.

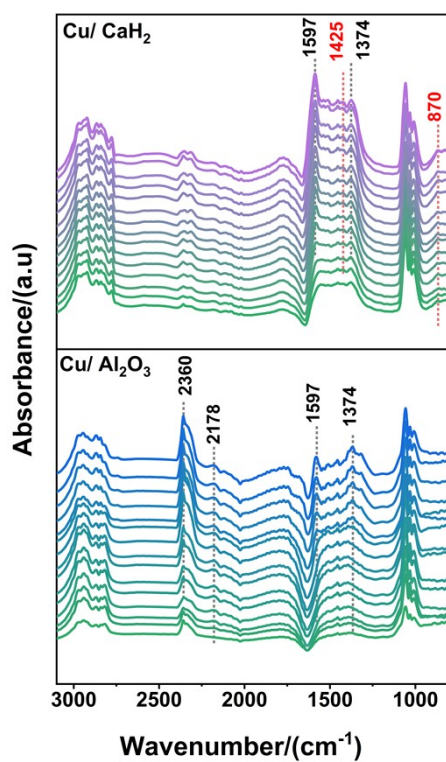

Fig.S10 In situ DRIFT spectra of  $\text{Cu/Al}_2\text{O}_3$  and  $\text{Cu/CaH}_2$  reacting with  $\text{CH}_3\text{OH/H}_2\text{O}$  mixed vapor (molar ratio 1:3) at 250 °C.

## 2. Supplementary Tables

Table S1 Summary of online MS experimental conditions for MSR over Cu supported on different carriers (CaH<sub>2</sub>, Ca(OH)<sub>2</sub>, Al<sub>2</sub>O<sub>3</sub>)

| No. | Reactants                                                               | m <sub>(solid reactants)</sub><br>/g | T<br>/ °C | feed rate /(mmol·min <sup>-1</sup> ) |                    |
|-----|-------------------------------------------------------------------------|--------------------------------------|-----------|--------------------------------------|--------------------|
|     |                                                                         |                                      |           | H <sub>2</sub> O                     | CH <sub>3</sub> OH |
| 1   | Cu/Al <sub>2</sub> O <sub>3</sub> +H <sub>2</sub> O +CH <sub>3</sub> OH | 2.31                                 | 250       | 0.75                                 | 0.25               |
| 2   | Cu/Ca(OH) <sub>2</sub> +H <sub>2</sub> O+CH <sub>3</sub> OH             | 2.31                                 | 250       | 0.75                                 | 0.25               |
| 3   | Cu/CaH <sub>2</sub> +H <sub>2</sub> O +CH <sub>3</sub> OH               | 2.31                                 | 250       | 0.75                                 | 0.25               |
| 4   | Cu/CaH <sub>2</sub> +H <sub>2</sub> O                                   | 2.31                                 | 250       | 0.75                                 | -                  |

Table S2 Summary of experimental conditions for online MS of Cu/CaH<sub>2</sub> reaction under different methanol-to-water ratios

| No. | n (CH <sub>3</sub> OH): n<br>(H <sub>2</sub> O) | x(CH <sub>3</sub> OH) | m <sub>(Cu/CaH<sub>2</sub>)</sub><br>/g | T<br>/ °C | feed rate /(mmol·min <sup>-1</sup> ) |                    |
|-----|-------------------------------------------------|-----------------------|-----------------------------------------|-----------|--------------------------------------|--------------------|
|     |                                                 |                       |                                         |           | H <sub>2</sub> O                     | CH <sub>3</sub> OH |
| 1   | 0.2:1                                           | 0.2                   | 2.31                                    | 250       | 0.750                                | 0.125              |
| 2   | 0.3:1                                           | 0.3                   | 2.31                                    | 250       | 0.750                                | 0.250              |
| 3   | 0.6:1                                           | 0.6                   | 2.31                                    | 250       | 0.750                                | 0.500              |
| 4   | CH <sub>3</sub> OH                              | 1                     | 2.31                                    | 250       | -                                    | 0.250              |
| 5   | H <sub>2</sub> O                                | 0                     | 2.31                                    | 250       | 0.750                                | -                  |

Table S3 Experimental details, key results and calculation details for comparison of Ca/KCl/Cu and CaH<sub>2</sub>/KCl/Cu coupled with MSR (Data for Fig. 2a in the main text)

| Terms                                   |                                       |                                                             | Ca/KCl/Cu | CaH <sub>2</sub> /KCl/Cu |
|-----------------------------------------|---------------------------------------|-------------------------------------------------------------|-----------|--------------------------|
| <b>Reactants</b>                        | $m_{\text{Ca}}/\text{g}$              | Amount of reactants                                         | 0.40      | 0.00                     |
|                                         | $m_{\text{CaH}_2}/\text{g}$           |                                                             | 0.00      | 0.42                     |
|                                         | $m_{\text{KCl}}/\text{g}$             |                                                             | 1.60      | 1.64                     |
|                                         | $m_{\text{CuO}}/\text{g}$             |                                                             | 0.20      | 0.21                     |
|                                         | $n_{\text{CH}_3\text{OH}}/\text{mol}$ |                                                             | 0.01      | 0.01                     |
|                                         | $n_{\text{H}_2\text{O}}/\text{mol}$   |                                                             | 0.03      | 0.03                     |
| <b>H<sub>2</sub> Yield <sup>a</sup></b> | $V_{\text{exp, total}}/\text{mL}$     | Experimental total H <sub>2</sub> volume at 298 K           | 719       | 828                      |
|                                         | $V_{\text{exp, h}}/\text{mL}$         | Experimental H <sub>2</sub> volume from hydrolysis at 298 K | 240       | 340                      |
|                                         | $V_{\text{exp, m}}/\text{mL}$         | Experimental H <sub>2</sub> volume from MSR at 298 K        | 479       | 488                      |
|                                         | $V_{\text{theo, m}}/\text{mL}$        | Theoretical H <sub>2</sub> volume from MSR at 298 K         | 736       | 736                      |
| <b>Methanol Conversion</b>              | $C_{\text{m}}/\%$                     | $V_{\text{exp, m}}/V_{\text{theo, m}}$                      | 66.06     | 66.28                    |
| <b>Gas Composition</b>                  | H <sub>2</sub> (%)                    | Volume percentage of gases in the products                  | 99.90     | 99.84                    |
|                                         | CO(%)                                 |                                                             | 0.10      | 0.16                     |
|                                         | CH <sub>4</sub> (%)                   |                                                             | 0.00      | 0.00                     |
|                                         | CO <sub>2</sub> (%)                   |                                                             | 0.00      | 0.00                     |

a. The experiment H<sub>2</sub> volume is calculated by the total gas volume at 298 K times the H<sub>2</sub> volume percentage from gas chromatography analysis.

Table S4 Assignment of the main absorption peaks observed in the spectra

| Substrates              | functional group               | Peak Position/cm <sup>-1</sup> |
|-------------------------|--------------------------------|--------------------------------|
| <b>CH<sub>3</sub>OH</b> | C-H                            | 2970、2922、2862、2842            |
|                         | -OCH <sub>3</sub>              | 1030                           |
|                         | C-H vibration of methoxy group | 2942、2820                      |
| <b>HCOOH</b>            | HCOO <sup>-</sup>              | 1580-1600、1367-1376            |
|                         | C=O                            | 1716                           |
| <b>carbonates</b>       | CO <sub>3</sub> <sup>2-</sup>  | 1425、870                       |
| <b>CO<sub>2</sub></b>   | -                              | 2360、2340                      |
| <b>CO</b>               | -                              | 2178                           |
